# Supplementary material for: Dental Implants Inserted in Fresh Extraction Sockets versus Healed Sites: A Systematic Review and Meta-Analysis
Source: MDPI journal article supplement (doi:10.3390/ma14247903), 2021-12-20
Supplement: s1 [file s1]

#### *SUPPLEMENTARY MATERIAL*

Dental implant-related journals included in the manual search;

Figure S1. Forest plot for the event 'implant failure', global results;

Figure S2. Forest plot for the event 'implant failure', when only results from RCT studies were pooled together;

Figure S3. Forest plot for the event 'implant failure', when only results from prospective non-RCT studies were pooled together;

Table S1. Detailed data of the included studies;

Table S2. Quality assessment of the included studies, according to the National Institutes of Health (NIH).

#### **Dental implant-related journals included in the manual search**

Clinical Implant Dentistry and Related Research, Clinical Oral Implants Research, European Journal of Oral Implantology, Implant Dentistry, International Journal of Implant Dentistry, International Journal of Oral and Maxillofacial Implants, International Journal of Oral Implantology, International Journal of Prosthodontics, Journal of Clinical Periodontology, Journal of Oral Implantology, Journal of Periodontology, Journal of Prosthetic Dentistry, Journal of Prosthodontics, Journal of Prosthodontic Research.

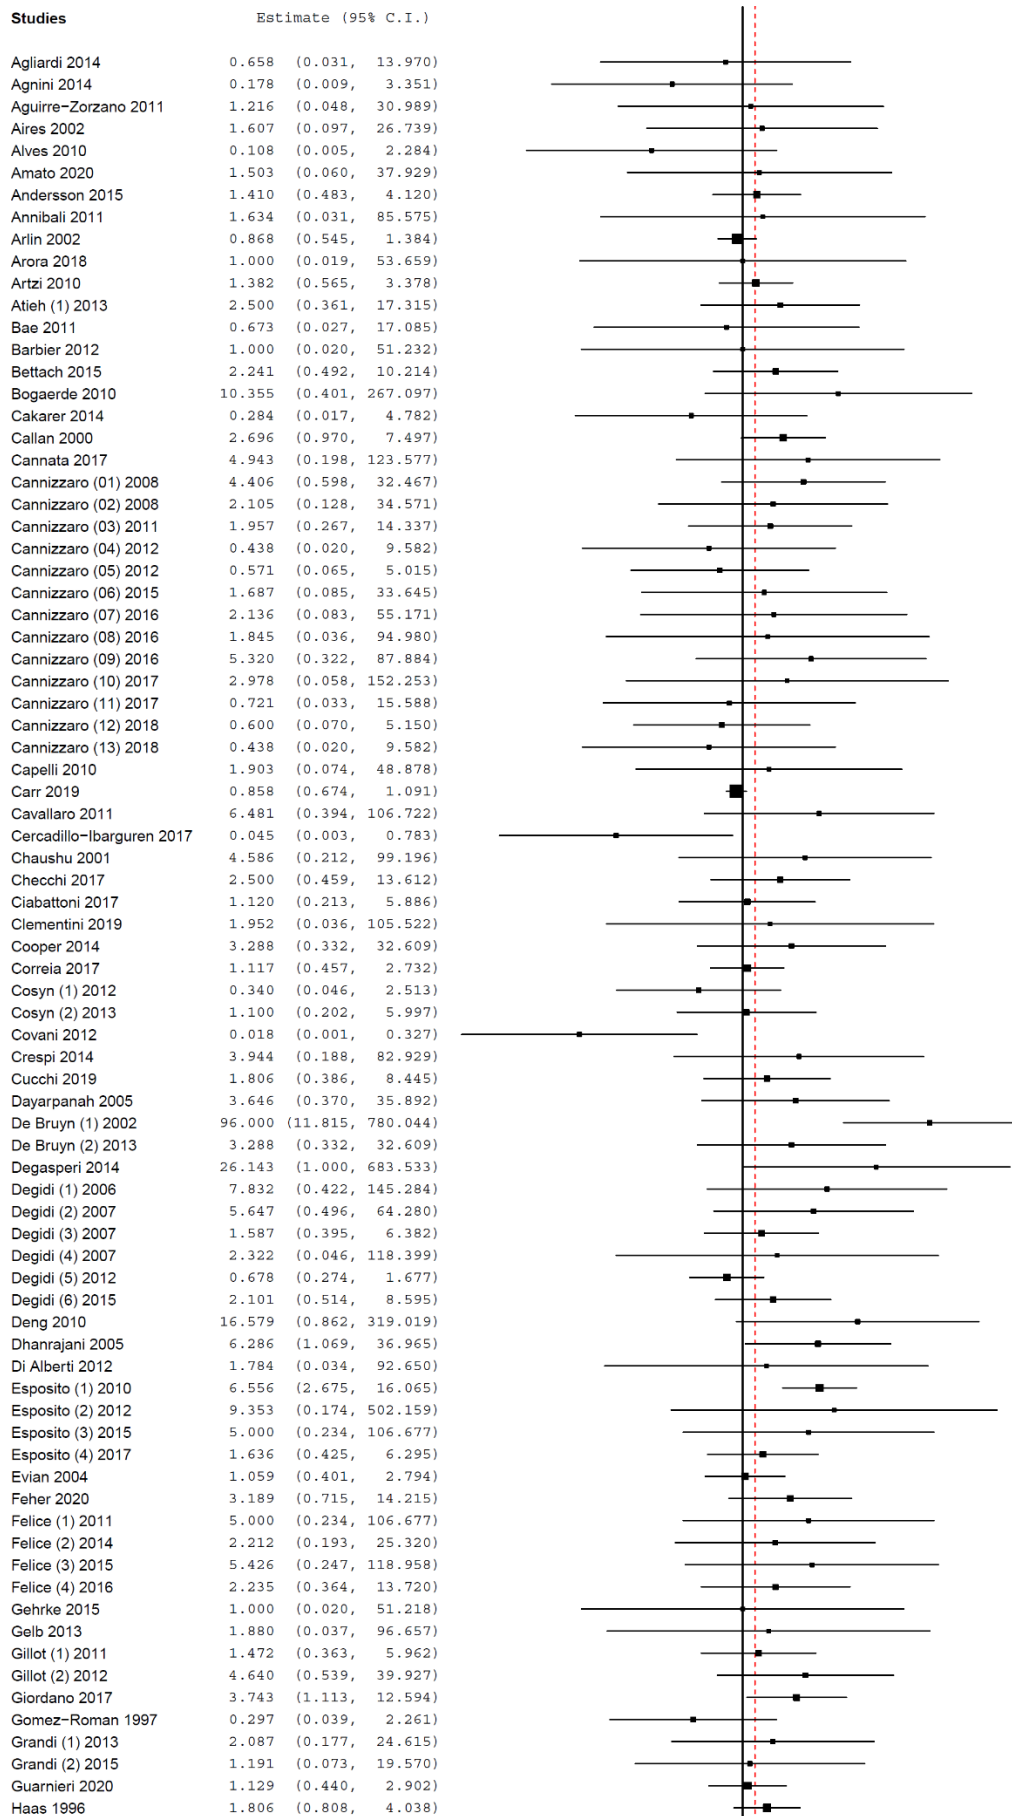

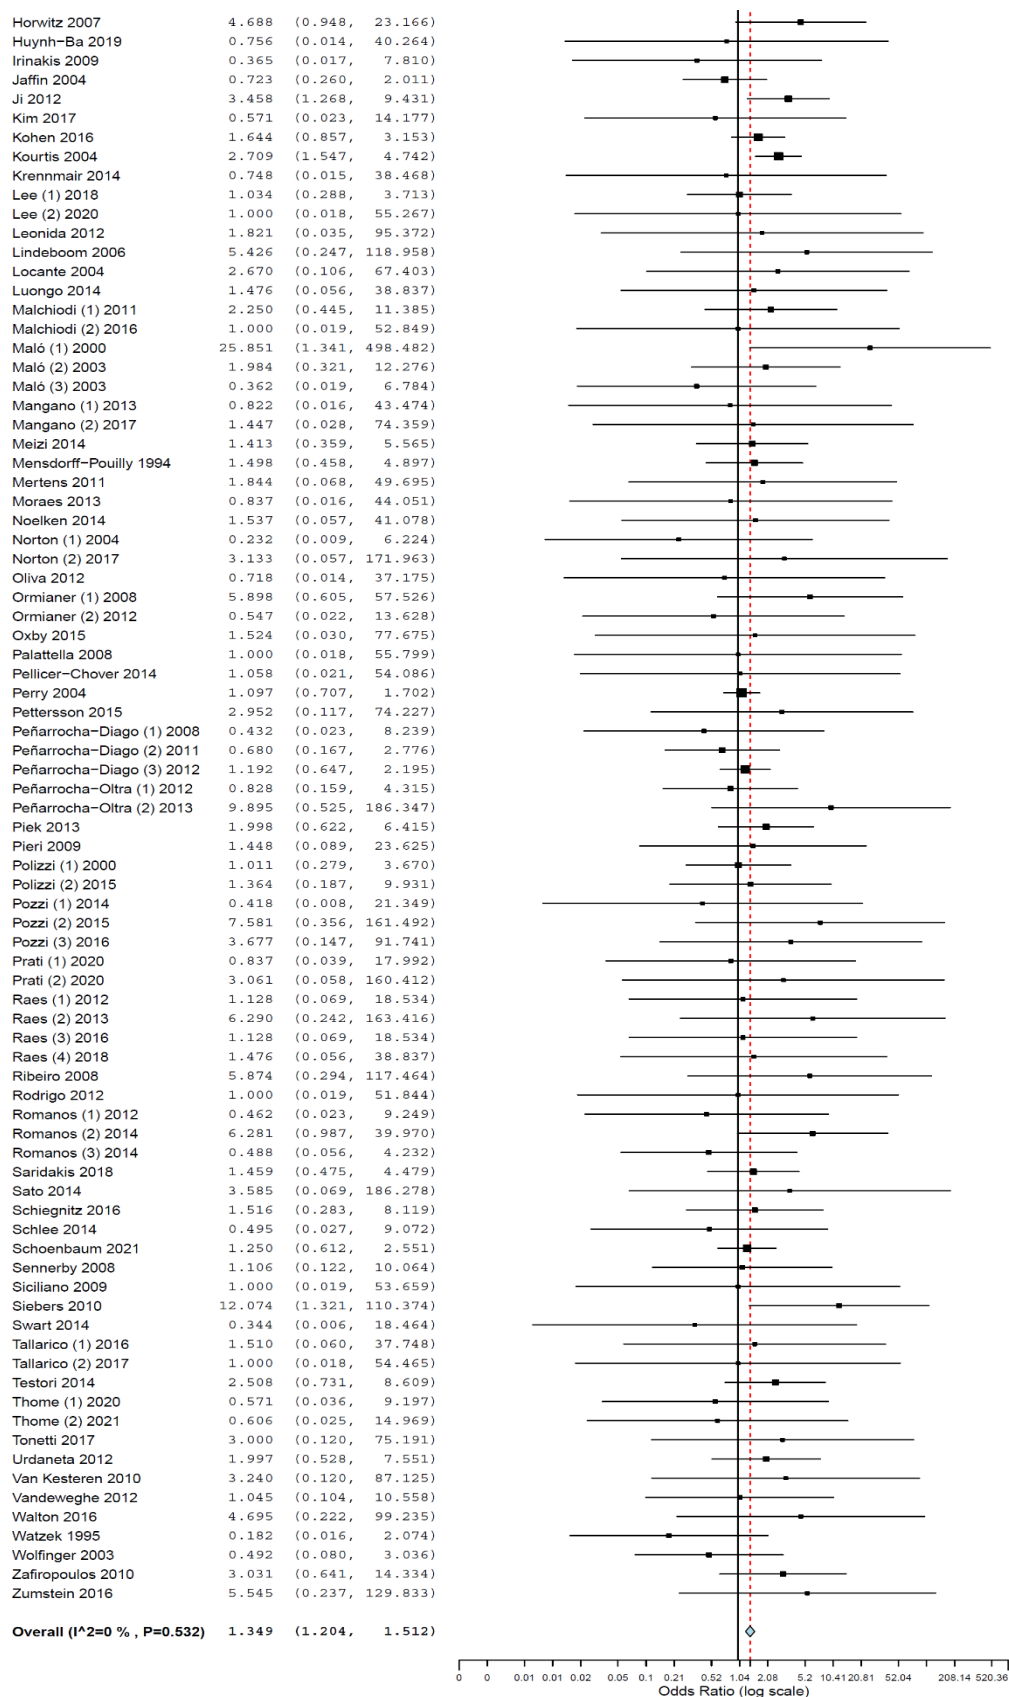

Figure S1. Forest plot for the event 'implant failure', global results.

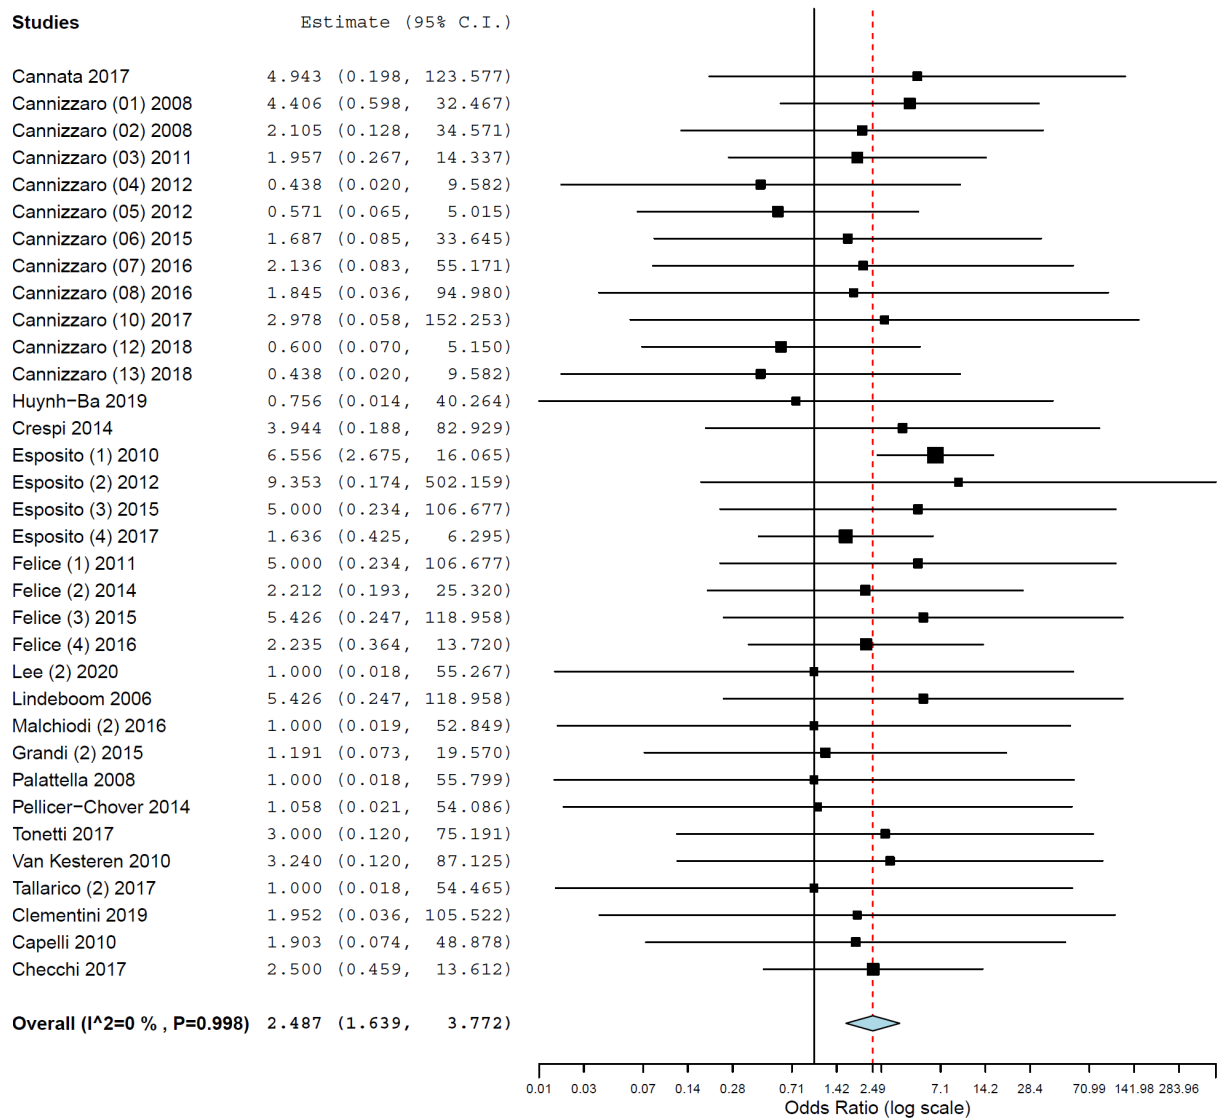

**Figure S2.** Forest plot for the event ‘implant failure’, when only results from RCT studies were pooled together.

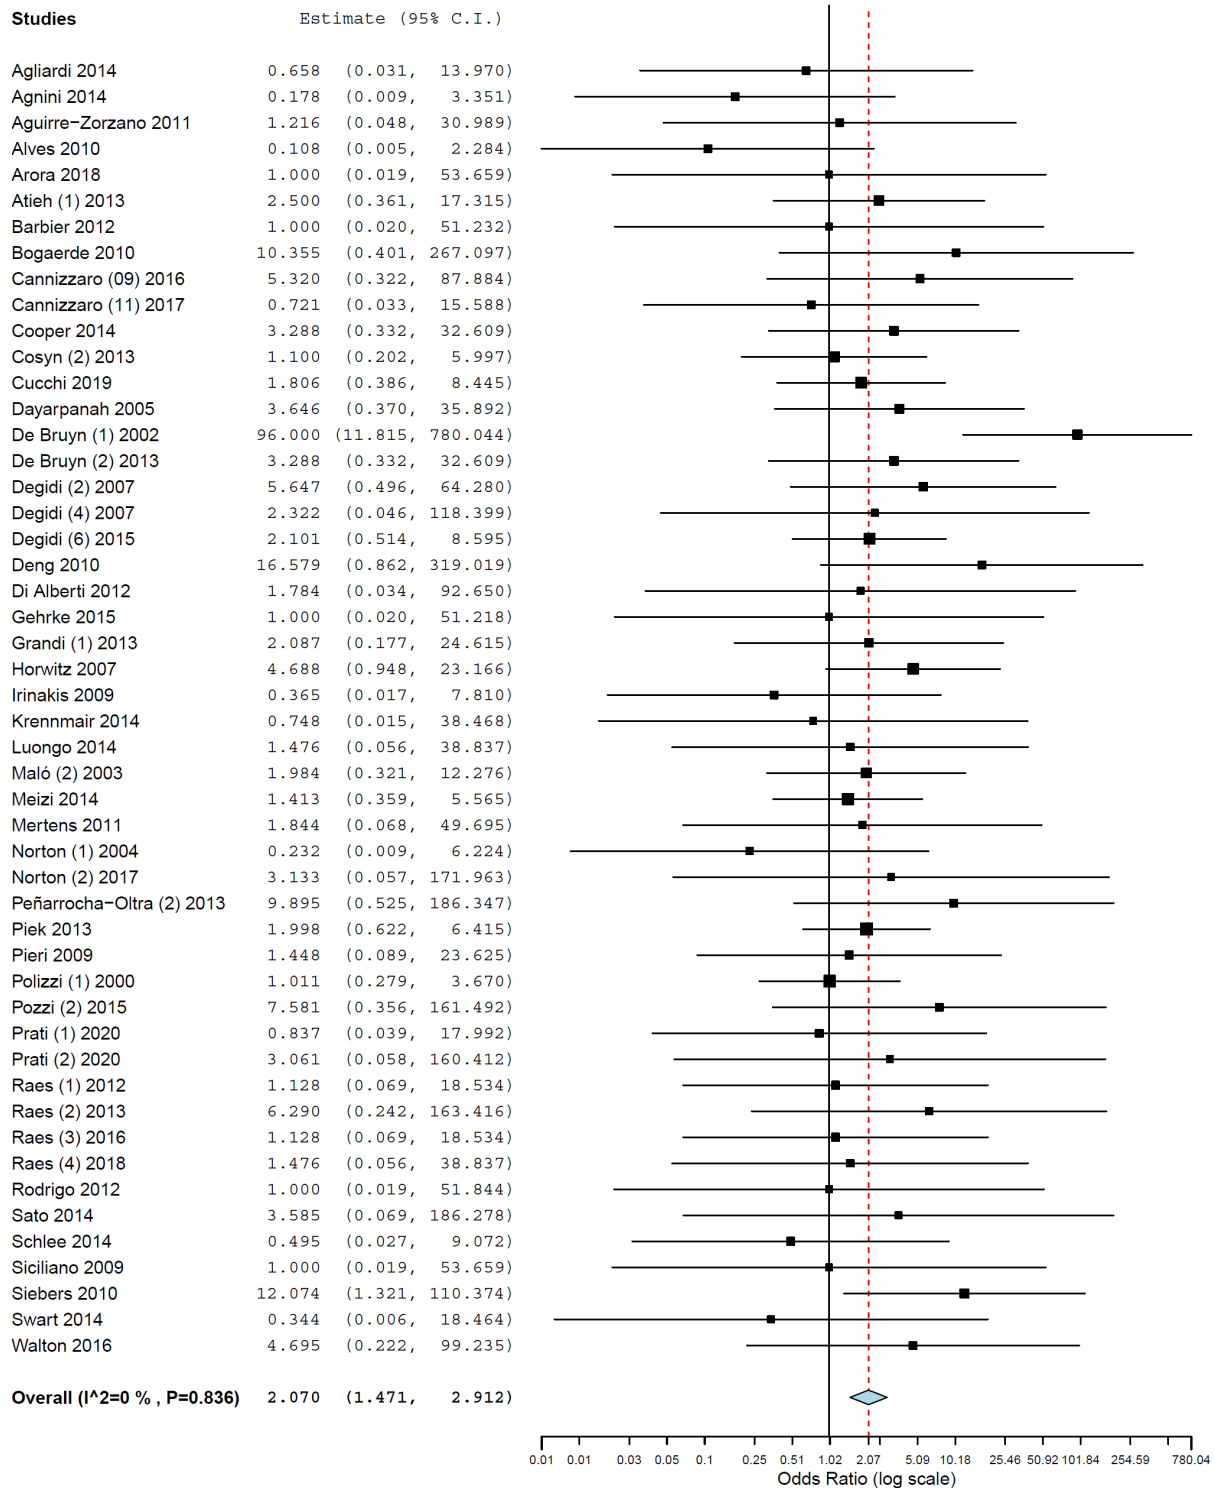

**Figure S3.** Forest plot for the event 'implant failure', when only results from prospective non-RCT studies were pooled together.

**Table S1.** Detailed data of the included studies.

| Study                  | Year | Study design      | Country / Setting                           | Patients (male/female) (n) | Patients' Age Range (mean) (years) | Prosthetic loading | Implants location | Implant used                                                                                                | Were there smokers in the group of patients? *    |
|------------------------|------|-------------------|---------------------------------------------|----------------------------|------------------------------------|--------------------|-------------------|-------------------------------------------------------------------------------------------------------------|---------------------------------------------------|
| <b>Agliardi</b>        | 2014 | CCT (unicenter)   | Italy / Private practice                    | 32 (15/17)                 | 44-68 (58)                         | Immediate          | Mx                | MK IV and NobelSpeedy Groovy (Nobel Biocare, Göteborg, Sweden)                                              | 11 light smokers                                  |
| <b>Agnini</b>          | 2014 | CCT (unicenter)   | Italy / University                          | 30 (10/20)                 | NM (64.4)                          | Immediate          | Mx, Md            | Tapered Screw-Vent and Spline implants (Zimmer Dental Inc., Carlsbad, USA)                                  | 7 light and heavy smokers                         |
| <b>Aguirre-Zorzano</b> | 2011 | CCT (unicenter)   | Spain / University                          | 57 (19/37)                 | 26-78 (48.5)                       | Immediate          | Mx, Md            | Osseospeed (Astra Tech Dental, Mölndal, Sweden)                                                             | NM                                                |
| <b>Aires</b>           | 2002 | RA (unicenter)    | USA / NM                                    | 7 (NM)                     | NM                                 | Immediate          | Mx, Md            | NM                                                                                                          | NM                                                |
| <b>Alves</b>           | 2010 | CCT (unicenter)   | Portugal / Private practice                 | 23 (12/11)                 | NM                                 | Immediate, delayed | Mx, Md            | Several (Straumann, Nobel Biocare, Biomet 3i, Lifecore)                                                     | 4 smokers                                         |
| <b>Amato</b>           | 2020 | RA (multicenter)  | Italy / Private practice                    | 55 (17/38)                 | 30-86 (63)                         | Immediate          | Mx, Md            | T3 (Zimmer Biomet, Warsaw, USA)                                                                             | 16 smokers                                        |
| <b>Andersson</b>       | 2015 | RA (multicenter)  | Sweden / Private practice                   | 55 (27/28)                 | NM                                 | Early (1-3 d)      | Mx, Md            | Bimodal and Proactive (Neoss Ltd, Harrogate, UK)                                                            | NM                                                |
| <b>Annibali</b>        | 2011 | RA (unicenter)    | Italy / University                          | 47 (19/18)                 | 20-62 (40)                         | Mean 4 mo          | Mx, Md            | Nobel Replace TiUnite (Nobel Biocare, Göteborg, Sweden), Pilot ZirTi (Sweden & Martina, Due Carrare, Italy) | Only light smokers, but exact number not informed |
| <b>Arlin</b>           | 2002 | RA (unicenter)    | Canada / Private practice                   | 961 (NM)                   | 15-70 (51)                         | NM                 | Mx, Md            | Several (Sulzer Dental, Nobel Biocare, Implant Innovations, Lifecore Biomedical, Straumann)                 | Yes, but exact number not informed                |
| <b>Arora</b>           | 2018 | PS (unicenter)    | Australia / Private practice                | 30 (13/17)                 | 26-77 (52)                         | Delayed (3-4 mo)   | Mx                | NM (Straumann, Basel, Switzerland)                                                                          | 1 light smoker                                    |
| <b>Artzi</b>           | 2010 | RA (unicenter)    | Israel / University                         | 54 (23/31)                 | 34-81 (57.5)                       | Immediate          | Mx, Md            | DFI, ITO, and SPI (Alpha-Bio Tec, Petach Tikva, Israel)                                                     | 21 heavy smokers                                  |
| <b>Atieh</b>           | 2013 | CCT (unicenter)   | New Zealand / University                    | 24 (9/15)                  | NM (52)                            | Immediate          | Md                | NM (Max Southern Implants, Irene, South Africa)                                                             | No                                                |
| <b>Bae</b>             | 2011 | RA (multicenter)  | South Korea / Private practice + University | 92 (41/51)                 | 21-71 (42)                         | Delayed (3-7 mo)   | Mx, Md            | Seven (MIS Implants Technologies Ltd., Tel Aviv, Israel)                                                    | NM                                                |
| <b>Barbier</b>         | 2012 | CCT (unicenter)   | Belgium / University                        | 20 (11/9)                  | 46-87 (61)                         | Immediate          | Mx                | Osseospeed (AstraTech AB, Mölndal, Sweden)                                                                  | 4 smokers                                         |
| <b>Bettach</b>         | 2015 | RA (unicenter)    | France / Private practice                   | 149 (79/70)                | 20-80 (51.8)                       | Immediate, delayed | Mx, Md            | ID ALL (Implant Diffusion International)                                                                    | Yes, but exact number not informed                |
| <b>Bogaerde</b>        | 2010 | CCT (multicenter) | Italy / Private practice                    | 21 (9/12)                  | 32-79 (60)                         | Within 7 days      | Mx, Md            | Bimodal (Neoss Ltd., Harrogate, UK)                                                                         | Yes, but exact number not informed                |
| <b>Cakarer</b>         | 2014 | RA (unicenter)    | Turkey / University                         | 274 (NM)                   | 19-84 (50)                         | Delayed (2-3 mo)   | Mx, Md            | Several (Astra Tech, Straumann, SwissPlus)                                                                  | Yes, but exact number not informed                |
| <b>Callan</b>          | 2000 | RA (multicenter)  | USA / Private practice                      | 663 (269/394)              | 16-90 (55.3)                       | Delayed (3-6 mo)   | Mx, Md            | NM                                                                                                          | 175 smokers                                       |

|                             |      |                    |                                   |            |              |                           |        |                                                                                                              |                                      |
|-----------------------------|------|--------------------|-----------------------------------|------------|--------------|---------------------------|--------|--------------------------------------------------------------------------------------------------------------|--------------------------------------|
| <b>Cannata</b>              | 2017 | RCT (multi-center) | Italy, Lebanon / Private practice | 90 (43/47) | 23-79 (51)   | Delayed (3 mo)            | Mx, Md | JDEvolution and JDIcon (J Dental Care, Modena, Italy)                                                        | 17 light smokers<br>10 heavy smokers |
| <b>Cannizzaro</b>           | 2008 | RCT (unicenter)    | Italy / Private practice          | 30 (15/15) | 42-75 (59)   | Immediate, early (2 mo)   | Mx     | Tapered SwissPlus (Zimmer Dental, Carlsbad, USA)                                                             | 8 light smokers<br>7 heavy smokers   |
| <b>Cannizzaro</b>           | 2008 | RCT (unicenter)    | Italy / Private practice          | 60 (25/35) | 36-80 (61)   | Immediate, early (6 wk)   | Md     | Tapered SwissPlus (Zimmer Dental, Carlsbad, USA)                                                             | 9 light smokers<br>21 heavy smokers  |
| <b>Cannizzaro</b>           | 2011 | RCT (unicenter)    | Italy / Private practice          | 40 (20/20) | 22-65 (44.5) | Immediate                 | Mx, Md | Tapered SwissPlus (Zimmer Dental, Carlsbad, USA)                                                             | 12 light smokers<br>8 heavy smokers  |
| <b>Cannizzaro</b>           | 2012 | RCT (unicenter)    | Italy / Private practice          | 30 (15/15) | 18-57 (35)   | Immediate, delayed (6 wk) | Mx, Md | NanoTite (Biomet 3i, Palm Beach, USA)                                                                        | 9 light smokers<br>3 heavy smokers   |
| <b>Cannizzaro</b>           | 2012 | RCT (unicenter)    | Italy / Private practice          | 50 (24/26) | 18-71 (38.8) | Immediate                 | Mx, Md | NanoTite (Biomet 3i, Palm Beach Gardens, USA)                                                                | 12 light smokers<br>4 heavy smokers  |
| <b>Cannizzaro</b>           | 2015 | RCT (unicenter)    | Italy / Private practice          | 60 (31/29) | 38-80 (59)   | Immediate                 | Mx, Md | Supershort and NT NanoTite (Biomet 3i, Palm Beach Gardens, USA)                                              | 7 light smokers<br>4 heavy smokers   |
| <b>Cannizzaro</b>           | 2016 | RCT (unicenter)    | Italy / Private practice          | 50 (25/25) | 19-62 (40)   | Immediate                 | Mx, Md | Syra and Syra SL (Sweden & Martina, Due Carrare, Italy)                                                      | 11 light smokers<br>6 heavy smokers  |
| <b>Cannizzaro</b>           | 2016 | RCT (unicenter)    | Italy / Private practice          | 40 (21/19) | 33-78 (56)   | Immediate                 | Mx, Md | Prama PF tapered (Sweden & Martina, Due Carrare, Italy)                                                      | 12 light smokers<br>4 heavy smokers  |
| <b>Cannizzaro</b>           | 2016 | PS (unicenter)     | Italy / Private practice          | 80 (40/40) | 29-85 (53.2) | Immediate                 | Md     | Tapered NT NanoTite (Biomet 3i, Palm Beach Gardens, USA)                                                     | 18 light smokers<br>16 heavy smokers |
| <b>Cannizzaro</b>           | 2017 | RCT (multi-center) | Italy / Private practice          | 60 (29/31) | 37-83 (59)   | Immediate                 | Md     | NT Full Osseotite (Zimmer Biomet, Palm Beach Gardens, USA), ExFeel (MegaGen Implant, Gyeongbuk, South Korea) | 11 light smokers<br>5 heavy smokers  |
| <b>Cannizzaro</b>           | 2017 | PS (unicenter)     | Italy / Private practice          | 40 (18/22) | NM (59)      | Immediate                 | Mx, Md | Syra and Syra SL (Sweden & Martina, Due Carrare, Italy)                                                      | 13 light smokers<br>4 heavy smokers  |
| <b>Cannizzaro</b>           | 2018 | RCT (multi-center) | Italy / Private practice          | 48 (28/20) | 36-78 (58)   | Immediate                 | Mx, Md | Syra and Syra SL (Sweden & Martina, Due Carrare, Italy)                                                      | 13 light smokers<br>4 heavy smokers  |
| <b>Cannizzaro</b>           | 2018 | RCT (unicenter)    | Italy / Private practice          | 30 (15/15) | 18-57 (35)   | Immediate, delayed (6 wk) | Mx, Md | NanoTite (Biomet 3i, Palm Beach Gardens, USA)                                                                | 9 light smokers<br>3 heavy smokers   |
| <b>Capelli</b>              | 2010 | RCT (multi-center) | Italy / Private practice          | 52 (23/29) | 27-74 (51)   | Immediate, early (2 mo)   | Mx, Md | Full Osseotite Tapered (Zimmer Biomet, Palm Beach Gardens, USA)                                              | 12 light smokers<br>1 heavy smokers  |
| <b>Carr</b>                 | 2019 | RA (unicenter)     | USA / Non-profit organization     | 2798 (NM)  | >18          | Immediate, delayed        | Mx, Md | NM                                                                                                           | Yes, but exact number not informed   |
| <b>Cavallaro</b>            | 2011 | RA (unicenter)     | USA / Private practice            | 75 (33/42) | 28-84 (61.8) | Delayed (6-8 wk)          | Mx, Md | NM (Implant Direct LLC, Calabasas, USA)                                                                      | 18 smokers                           |
| <b>Cercadillo-Ibarguren</b> | 2017 | RA (unicenter)     | Spain / Private practice          | 88 (40/48) | 40-84 (62.4) | Immediate, delayed        | Mx, Md | Replace Select Tapered TiUnite (Nobel Biocare, Göteborg, Sweden)                                             | 2 light smokers<br>26 heavy smokers  |
| <b>Chausu</b>               | 2001 | RA (unicenter)     | Israel / Private practice         | 26 (6/20)  | 18-70 (44)   | Immediate                 | Mx, Md | Steri-Oss (Steri-Oss Company, Yorba Linda, USA), NM (Alpha Bio, Petah-Tikva, Israel)                         | No                                   |

|                   |      |                    |                                           |               |              |                                 |        |                                                                                                                                             |                                                                |
|-------------------|------|--------------------|-------------------------------------------|---------------|--------------|---------------------------------|--------|---------------------------------------------------------------------------------------------------------------------------------------------|----------------------------------------------------------------|
| <b>Checchi</b>    | 2017 | RCT (multi-center) | Italy / Private practice + University     | 100 (51/49)   | NM (53)      | Delayed (4 mo)                  | Mx, Md | Rescue (MegaGen Implant, Gyeongbuk, South Korea)                                                                                            | 17 light smokers<br>7 heavy smokers                            |
| <b>Ciabattoni</b> | 2017 | RA (multi-center)  | Italy / Private practice                  | 32 (9/23)     | 44-73 (59.5) | Immediate                       | Mx, Md | Mk III TiUnite, NobelActive, Speedy Groovy, Nobel Replace (Nobel Biocare, Göteborg, Sweden)                                                 | Light smokers, but the exact number was not informed           |
| <b>Clementini</b> | 2019 | RCT (multi-center) | Italy / University                        | 30 (14/16)    | NM (52)      | Not loaded                      | Mx, Md | TTi WINSIX (Biosafin, Ancona, Italy)                                                                                                        | 10 light smokers                                               |
| <b>Cooper</b>     | 2014 | CCT (multi-center) | USA, Spain, Germany, Belgium / University | 113 (47/66)   | NM (42-45)   | Immediate                       | Mx     | Osseospeed (AstraTech AB, Mölndal, Sweden)                                                                                                  | No                                                             |
| <b>Correia</b>    | 2017 | RA (unicenter)     | Portugal / Private practice               | 202 (70/132)  | 23-73 (50)   | Immediate, delayed              | Mx, Md | Several (Straumann, Nobel Biocare, Biomet 3i, Neodent, Klockner, EuroTeknika)                                                               | 15 light smokers<br>29 heavy smokers                           |
| <b>Cosyn</b>      | 2012 | RA (unicenter)     | Belgium / University                      | 461 (216/245) | 18-90 (51)   | Immediate, within 3 mo, delayed | Mx, Md | Several (Nobel Biocare, Straumann, Dentsply Friadent, Astra Tech, Biomet 3i)                                                                | Yes, but exact number not informed                             |
| <b>Cosyn</b>      | 2013 | CCT (multicenter)  | Belgium / University                      | 104 (43/61)   | 22-80 (51)   | Immediate, delayed (3-6 mo)     | Mx     | TiUnite NobelReplace (Nobel Biocare, Göteborg, Sweden)                                                                                      | 18 smokers                                                     |
| <b>Covani</b>     | 2012 | RA (unicenter)     | Italy / Private practice                  | 19 (6/13)     | 39-72 (60)   | Immediate                       | Mx, Md | Ossean, (Intra-Lock International, Inc, Boca Raton, USA)                                                                                    | Light smokers, but exact number not informed                   |
| <b>Crespi</b>     | 2014 | RCT (unicenter)    | Italy / University                        | 28 (13/15)    | 46-77 (59.3) | Immediate                       | Mx, Md | Outlink (Sweden & Martina, Due Carrare, Italy)                                                                                              | Light smokers, but the exact number was not informed           |
| <b>Cucchi</b>     | 2019 | PS (NM)            | Italy / NM                                | 20 (NM)       | NM (67)      | Early (3-5 d)                   | Mx, Md | NM                                                                                                                                          | 28% of the implants in smokers                                 |
| <b>Davarpanah</b> | 2005 | CCT (unicenter)    | France / Private practice                 | 92 (36/56)    | NM (59.8)    | Delayed (3-6 mo)                | Mx, Md | Osseotite NT (Biomet 3i, Palm Beach Gardens, USA)                                                                                           | Yes, but exact number not informed                             |
| <b>De Bruyn</b>   | 2002 | CCT (unicenter)    | Belgium / University                      | 36 (18/18)    | 63-81 (NM)   | Within 8 days                   | Md     | Brånemark (Nobel Biocare AB, Göteborg, Sweden)                                                                                              | Yes, but exact number not informed                             |
| <b>De Bruyn</b>   | 2013 | CCT (multicenter)  | Belgium, Spain, USA, Germany / University | 113 (47/66)   | NM (42-45)   | Immediate                       | Mx     | Osseospeed (Astra Tech AB, Mölndal, Sweden)                                                                                                 | No                                                             |
| <b>Degasperi</b>  | 2014 | RA (NM)            | Italy / Private practice                  | 49 (20/49)    | 29-79 (50.9) | Delayed (3-4 mo)                | Mx, Md | Neoss Proactive (Neoss Ltd, Harrogate, UK)                                                                                                  | NM                                                             |
| <b>Degidi</b>     | 2006 | RA (unicenter)     | Italy / University                        | 111 (46/65)   | 15-83 (40)   | Immediate                       | Mx, Md | Several                                                                                                                                     | 19 light and heavy smokers                                     |
| <b>Degidi</b>     | 2007 | CCT (unicenter)    | Italy / University                        | NM            | 15-83 (55)   | Immediate                       | Mx, Md | Several                                                                                                                                     | Yes, but exact number not informed                             |
| <b>Degidi</b>     | 2007 | RA (unicenter)     | Italy / University                        | 133 (NM)      | 41-80 (56)   | Immediate                       | Mx, Md | Several                                                                                                                                     | Yes, but exact number not informed                             |
| <b>Degidi</b>     | 2007 | PS (unicenter)     | Italy / University                        | 50 (22/28)    | 42-77 (57.5) | Immediate                       | Md     | Brånemark (Nobel Biocare, Göteborg, Sweden), Frialit, XiVE, IMZ, and Frialoc (Dentsply Friadent), Maestro (BioHorizons), Restore (Lifecore) | Light and heavy smokers, but the exact number was not informed |



|                   |      |                   |                                       |                |              |                           |        |                                                                                                                                                                                                      |                                                                       |
|-------------------|------|-------------------|---------------------------------------|----------------|--------------|---------------------------|--------|------------------------------------------------------------------------------------------------------------------------------------------------------------------------------------------------------|-----------------------------------------------------------------------|
| <b>Degidi</b>     | 2012 | RA (unicenter)    | Italy / University                    | 1045 (NM)      | 18-93 (NM)   | NM                        | Mx, Md | XiVe (Dentsply Friadent, Mannheim, Germany)                                                                                                                                                          | Yes, but exact number not informed                                    |
| <b>Degidi</b>     | 2015 | PS (unicenter)    | Italy / Private practice              | 114 (NM)       | NM (53.1)    | Immediate                 | Mx, Md | XiVE (Dentsply, Mannheim, Germany)                                                                                                                                                                   | 34 smokers                                                            |
| <b>Deng</b>       | 2010 | CCT (unicenter)   | China / University                    | 12 (4/8)       | 40-75 (62)   | Immediate                 | Mx, Md | TiUnite, Brånemark System Mk III, NobelSpeedy (Nobel Biocare, Göteborg, Sweden)                                                                                                                      | 9 smokers                                                             |
| <b>Dhanrajani</b> | 2005 | RA (unicenter)    | Saudi Arabia / Private practice       | 101 (30/71)    | 17-69 (NM)   | Immediate, delayed        | Mx, Md | Brånemark (Nobel Biocare AB, Göteborg, Sweden), Osseotite NT (Biomet 3i, Palm Beach Gardens, USA), Omniloc (Calcitek Sulzer, Carlsbad, USA), Steri-Oss, Replace (Nobel Biocare AB, Göteborg, Sweden) | 17 light smokers<br>7 heavy smokers                                   |
| <b>Di Alberti</b> | 2012 | CCT (unicenter)   | Italy / Private practice              | 70 (33/37)     | 16-71 (45)   | Immediate                 | Mx     | Seven (MIS)                                                                                                                                                                                          | NM                                                                    |
| <b>Esposito</b>   | 2010 | RCT (multicenter) | Italy / Private practice              | 506 (236/270)  | 18-86 (48)   | Not loaded                | Mx, Md | Several                                                                                                                                                                                              | 115 light smokers<br>54 heavy smokers                                 |
| <b>Esposito</b>   | 2012 | RCT (multicenter) | Italy / Private practice              | 60 (31/29)     | 25-81 (53)   | Early (within 2 wk)       | Mx     | Xpeed (MegaGen Implant, Gyeongbuk, South Korea)                                                                                                                                                      | 8 light smokers<br>3 heavy smokers                                    |
| <b>Esposito</b>   | 2015 | RCT (multicenter) | Italy / Private practice              | 106 (46/60)    | 28-72 (49)   | Immediate                 | Mx     | EZ Plus (MegaGen Implant, Gyeongbuk, South Korea)                                                                                                                                                    | 15 light smokers<br>7 heavy smokers                                   |
| <b>Esposito</b>   | 2017 | RCT (multicenter) | Italy / Private practice              | 210 (107/103)  | 29-79 (54)   | Delayed (4 mo)            | Mx, Md | NobelActive (Nobel Biocare, Göteborg, Sweden)                                                                                                                                                        | 59 light smokers<br>16 heavy smokers                                  |
| <b>Evian</b>      | 2004 | RA (unicenter)    | USA / University                      | 149 (NM)       | NM           | Delayed (4-6 mo)          | Mx, Md | NM (Paragon, Zimmer Dental, Carlsbad, USA)                                                                                                                                                           | NM                                                                    |
| <b>Feher</b>      | 2020 | RA (unicenter)    | Austria / University                  | 1132 (505/627) | NM (50.6)    | Not loaded                | Mx, Md | NM                                                                                                                                                                                                   | 157 light smokers<br>60 heavy smokers                                 |
| <b>Felice</b>     | 2011 | RCT (multicenter) | Italy / Private practice              | 106 (46/60)    | 28-72 (49)   | Immediate, delayed (4 mo) | Mx     | EZ Plus (MegaGen, Gyeongbuk, South Korea)                                                                                                                                                            | 15 light smokers<br>7 heavy smokers                                   |
| <b>Felice</b>     | 2014 | RCT (multicenter) | Italy / Private practice              | 64 (35/29)     | 19-80 (52)   | Immediate, early, delayed | Mx, Md | Way Milano and Kentron (Geass srl, Pozzuolo Del Friuli, Udine, Italy)                                                                                                                                | 11 light smokers<br>6 heavy smokers                                   |
| <b>Felice</b>     | 2015 | RCT (multicenter) | Italy / Private practice              | 50 (25/25)     | 32-72 (52)   | Immediate, delayed (4 mo) | Mx     | XiVE S plus (Dentsply Friadent, Mannheim, Germany)                                                                                                                                                   | 17 light smokers<br>3 heavy smokers                                   |
| <b>Felice</b>     | 2016 | RCT (multicenter) | Italy / Private practice + University | 150 (66/84)    | 20-86 (54)   | Delayed (3 mo)            | Mx, Md | TwinKon Universal SA2 (Global D, Lyon, France)                                                                                                                                                       | 33 light smokers<br>7 heavy smokers                                   |
| <b>Gehrke</b>     | 2015 | CCT (unicenter)   | Brazil / NM                           | 77 (24/53)     | 26-65 (NM)   | Not loaded                | Mx, Md | NM (Implacil De Bortoli, São Paulo, Brazil)                                                                                                                                                          | No                                                                    |
| <b>Gelb</b>       | 2013 | RA (multicenter)  | USA / Private practice                | 52 (21/31)     | 35-82 (64.1) | Delayed (4-12 mo)         | Mx, Md | TiUnite (Nobel Biocare, Göteborg, Sweden)                                                                                                                                                            | 3 smokers                                                             |
| <b>Gillot</b>     | 2011 | RA (multicenter)  | France / Private practice             | 105 (53/52)    | NM (58.7)    | Immediate                 | Md     | TiUnite (Nobel Biocare, Göteborg, Sweden)                                                                                                                                                            | Smokers (<15 cig/day) included, but the exact number was not informed |

|                    |      |                    |                                        |               |              |                           |        |                                                                                                                           |                                                                       |
|--------------------|------|--------------------|----------------------------------------|---------------|--------------|---------------------------|--------|---------------------------------------------------------------------------------------------------------------------------|-----------------------------------------------------------------------|
| <b>Gillot</b>      | 2012 | RA (multi-center)  | France / Private practice              | 113 (56/57)   | 37-93 (60.4) | Immediate                 | Mx     | TiUnite MkIII, MkIV, Speedy, NobelActive (Nobel Biocare, Göteborg, Sweden)                                                | Smokers (<15 cig/day) included, but the exact number was not informed |
| <b>Giordano</b>    | 2017 | RA (unicenter)     | Italy / Private practice               | 104 (43/61)   | 37-87 (61.2) | Immediate                 | Mx, Md | SPI-Contact (Thommen Medical, Grenchen, Switzerland)                                                                      | 20 light smokers<br>24 heavy smokers                                  |
| <b>Gomez-Roman</b> | 1997 | RA (unicenter)     | Germany / University                   | 376 (199/177) | 15-88 (38.8) | Delayed (3-8 mo)          | Mx, Md | Frialit-2 (Dentsply Friadent, Mannheim, Germany)                                                                          | NM                                                                    |
| <b>Grandi</b>      | 2013 | CCT (multi-center) | Italy / Private practice               | 50 (21/29)    | 31-73 (56)   | Immediate                 | Mx     | JD Evolution (J DentalCare, Modena, Italy)                                                                                | 19 light and heavy smokers                                            |
| <b>Grandi</b>      | 2015 | RCT (multi-center) | Italy / Private practice               | 105 (50/55)   | 21-75 (47)   | Immediate, early, delayed | Mx, Md | JD Evolution (J DentalCare, Modena, Italy)                                                                                | 19 light smokers<br>6 heavy smokers                                   |
| <b>Guarnieri</b>   | 2020 | RA (multi-center)  | Italy / Private practice               | 274 (146/128) | 45-75 (48.1) | Immediate, delayed        | Mx, Md | BioHorizons TLX and TRX (BioHorizons)                                                                                     | 124 smokers                                                           |
| <b>Haas</b>        | 1996 | RA (unicenter)     | Austria / University                   | 607 (246/361) | 21-86 (51.5) | Delayed (3-6)             | Mx, Md | IMZ (Friatec, Friedrichseld, Germany)                                                                                     | NM                                                                    |
| <b>Horwitz</b>     | 2007 | CCT (unicenter)    | Israel / Private practice              | 19 (2/17)     | 34-79 (NM)   | Delayed (6 mo)            | Mx, Md | NM (MIS Implant Technologies, Shlomi, Israel)                                                                             | NM                                                                    |
| <b>Huynh-Ba</b>    | 2019 | RCT (unicenter)    | USA / University                       | 35 (18/17)    | 27-74 (52)   | Delayed (4 mo)            | Mx, Md | Bone Level SLActive (Straumann, Basel, Switzerland)                                                                       | Light smokers, but exact number not informed                          |
| <b>Irinakis</b>    | 2009 | CCT (multicenter)  | Canada / Private practice              | 67 (NM)       | NM           | Immediate, delayed        | Mx, Md | NobelActive (Nobel Biocare, Göteborg, Sweden)                                                                             | NM                                                                    |
| <b>Jaffin</b>      | 2004 | RA (unicenter)     | USA / University                       | 34 (19/15)    | 43-82 (60)   | Immediate                 | Mx     | SLA (Straumann, Waldenburg, Switzerland)                                                                                  | Yes, but exact number not informed                                    |
| <b>Ji</b>          | 2012 | RA (unicenter)     | USA / University                       | 45 (18/27)    | 25-88 (61.5) | Immediate                 | Mx, Md | TiUnite (Nobel Biocare, Göteborg, Sweden), NM (Zimmer Dental, Carlsbad, USA), XiVe (Dentsply Friadent, Mannheim, Germany) | 8 smokers                                                             |
| <b>Kim</b>         | 2017 | RA (unicenter)     | South Korea / University               | 116 (55/61)   | 17-76 (50.9) | Delayed (10-22 wk)        | Mx, Md | Oneplant (Warantec, Seoul, Republic of Korea) IS-II (Neobiotech, Seoul, Republic of Korea)                                | NM                                                                    |
| <b>Kohen</b>       | 2016 | RA (unicenter)     | Israel / Private practice              | 343 (NM)      | > 18         | Immediate, early, delayed | Mx, Md | Several (SPI; DFI; Arrow, Alph-Bio-Tec; screw-vent TSV, Zimmer Dental; Maestro, BioHorizons HPI Inc)                      | NM                                                                    |
| <b>Kourtis</b>     | 2004 | RA (multicenter)   | Greece / Private practice + University | 405 (171/234) | 18-83 (54.3) | Immediate, delayed        | Mx, Md | Several (IMZ, Frialit-2, Free-Hex, Frialoc, Friadent Co., Mannheim, Germany)                                              | Yes, but exact number not informed                                    |
| <b>Krennmair</b>   | 2014 | PS (unicenter)     | Austria / University                   | 24 (14/10)    | 38-84 (61.5) | Immediate                 | Md     | Screw-Line Promote plus (Camlog, Wimsheim, Germany)                                                                       | Light smokers, but exact number not informed                          |
| <b>Lee</b>         | 2018 | RA (unicenter)     | Taiwan / Private practice              | 161 (NM)      | 23-90 (53)   | Immediate, delayed        | Mx, Md | IDEOSS (IDEOSS Biotech, Taipei, Taiwan)                                                                                   | Yes, but the exact number was not reported                            |
| <b>Lee</b>         | 2020 | RCT (unicenter)    | Switzerland / University               | 20 (12/8)     | ≥ 22         | Delayed (8 wk)            | Mx, Md | BLT (Straumann, Basel, Switzerland)                                                                                       | NM                                                                    |
| <b>Leonida</b>     | 2012 | RA (unicenter)     | Italy / University                     | 9 (1/8)       | 45-68 (NM)   | Immediate                 | Md     | Way (Geass, Pozzuolo del Friuli, Italy)                                                                                   | No                                                                    |

|                          |      |                   |                                                             |             |              |                                  |        |                                                                                                     |                                              |
|--------------------------|------|-------------------|-------------------------------------------------------------|-------------|--------------|----------------------------------|--------|-----------------------------------------------------------------------------------------------------|----------------------------------------------|
| <b>Lindeboom</b>         | 2006 | RCT (unicenter)   | Netherlands / University                                    | 50 (25/25)  | 19-69 (39.7) | Delayed (6 mo)                   | Mx     | Frialit-2 Synchro (Dentsply Friadent, Mannheim, Germany)                                            | No                                           |
| <b>Locante</b>           | 2004 | RA (unicenter)    | USA / Private practice                                      | 86 (35/51)  | 12-81 (NM)   | Immediate                        | Mx     | Stabledent (Crystal Medical Technology, Pelham, USA)                                                | 9 smokers                                    |
| <b>Luongo</b>            | 2014 | CCT (multicenter) | Italy / Private practice                                    | 46 (23/23)  | 18-73 (44.5) | Immediate                        | Mx, Md | AnyRidge (MegaGen, Gyeongbuk, South Korea)                                                          | 17 smokers                                   |
| <b>Malchiodi</b>         | 2011 | RA (unicenter)    | Italy / University                                          | 81 (NM)     | NM           | Immediate                        | Mx     | Osseotite Certain (Biomet 3i, Palm Beach Gardens, USA), FBR Pitt-Easy (Oraltronic, Bremen, Germany) | Yes, but exact number not informed           |
| <b>Malchiodi</b>         | 2016 | RCT (unicenter)   | Italy / University                                          | 40 (24/16)  | 35-75 (52)   | Delayed (3 mo)                   | Mx, Md | SybronPRO XR (Sybron Implant Solutions)                                                             | 10 light and heavy smokers                   |
| <b>Maló</b>              | 2000 | RA (unicenter)    | Portugal / Private practice                                 | 49 (18/31)  | 16-64 (42)   | Immediate                        | Mx, Md | Brånemark MkII (Nobel Biocare AB, Göteborg, Sweden)                                                 | Light smokers, but exact number not informed |
| <b>Maló</b>              | 2003 | CCT (multicenter) | Portugal, Sweden, Italy / Private practice + Public service | 76 (41/35)  | 18-81 (41)   | Immediate                        | Mx, Md | Brånemark (Nobel Biocare AB, Göteborg, Sweden)                                                      | 24 heavy smokers                             |
| <b>Maló</b>              | 2003 | RA (unicenter)    | Portugal / Private practice                                 | 44 (15/29)  | 30-79 (59)   | Immediate                        | Md     | Brånemark MkII and MkIII (Nobel Biocare AB, Göteborg, Sweden)                                       | NM                                           |
| <b>Mangano</b>           | 2013 | RA (unicenter)    | Italy / Private practice                                    | 40 (26/14)  | 18-62 (45)   | Immediate                        | Mx     | NM (Sistema Implantare Leone, Sesto Fiorentino, Italy)                                              | Patients smoking less than 15 cig./day       |
| <b>Mangano</b>           | 2017 | RA (multicenter)  | Brazil, Italy / Private practice                            | 103 (43/60) | 24-65 (41.4) | Immediate                        | Mx     | Tixos (Leader Implants, Milan, Italy)                                                               | No                                           |
| <b>Meizi</b>             | 2014 | CCT (unicenter)   | Israel / NM                                                 | 155 (40/95) | 20-70 (47.5) | Immediate, delayed (3-6 mo)      | Mx, Md | Saturn (Cortex Dental, Shlomi, Israel)                                                              | 12 heavy smokers                             |
| <b>Mensdorff-Pouilly</b> | 1994 | RA (unicenter)    | Austria / University                                        | 31 (12/19)  | NM           | Delayed (3-6 mo)                 | Mx, Md | IMZ (Friatec, Mannheim, Germany), Brånemark (Nobel Biocare, Göteborg, Sweden)                       | NM                                           |
| <b>Mertens</b>           | 2011 | CCT (unicenter)   | Germany / University                                        | 17 (5/12)   | 40-83 (61)   | Immediate, delayed (mean 9.5 wk) | Mx, Md | Osseospeed (AstraTech AB, Mölndal, Sweden)                                                          | 2 smokers                                    |
| <b>Moraes</b>            | 2013 | RA (multicenter)  | Brazil / University, private practice                       | 27 (9/18)   | 25-80 (56)   | Delayed (4-6 mo)                 | Mx, Md | Way Syntegra (Geass, Udine, Italy)                                                                  | NM                                           |
| <b>Noelken</b>           | 2014 | RA (unicenter)    | Germany / Private practice                                  | 20 (10/10)  | 31-69 (NM)   | Immediate                        | Mx, Md | NobelPerfect (Nobel Biocare, Göteborg, Sweden)                                                      | 5 smokers                                    |
| <b>Norton</b>            | 2004 | CCT (unicenter)   | UK / Private practice                                       | 25 (10/15)  | 27-72 (48.2) | Immediate                        | Mx     | TiO-Blast (AstraTech ST, Mölndal, Sweden)                                                           | Yes, but exact number not informed           |
| <b>Norton</b>            | 2017 | PS (unicenter)    | United Kingdom / Private practice                           | 22 (10/12)  | 22-79 (NM)   | Immediate                        | Mx, Md | Astra Tech AV (Dentsply, Mölndal, Sweden)                                                           | 1 light smoker                               |
| <b>Oliva</b>             | 2012 | RA (unicenter)    | Spain / Private practice                                    | 17 (11/6)   | 39-79 (52.9) | Delayed (4 mo)                   | Mx, Md | Straumann (Straumann, Basel, Switzerland), Osstem (Osstem, Seoul, South Korea)                      | 8 smokers                                    |

|                         |      |                   |                                               |               |                                    |                           |        |                                                                                     |                                                   |
|-------------------------|------|-------------------|-----------------------------------------------|---------------|------------------------------------|---------------------------|--------|-------------------------------------------------------------------------------------|---------------------------------------------------|
| <b>Ormianer</b>         | 2008 | RA (multicenter)  | Israel / Private practice                     | 60 (26/34)    | 18-78 (53)                         | Immediate, delayed        | Mx, Md | Tapered Screw-Vent MTX (Zimmer Dental, Inc, Carlsbad, USA)                          | 2 smokers                                         |
| <b>Ormianer</b>         | 2012 | RA (unicenter)    | Israel / Private practice                     | 46 (19/27)    | NM (50)                            | Immediate, delayed        | Mx     | Tapered Screw-Vent MTX (Zimmer Dental, Inc, Carlsbad, USA)                          | 1 smoker                                          |
| <b>Oxby</b>             | 2015 | RA (unicenter)    | Sweden / Private practice                     | 39 (17/22)    | > 20 (68)                          | Early (within 60 d)       | Mx, Md | OsseoSpeed (Astra Tech, Dentsply Implants, Mölndal, Sweden)                         | 1 extra-heavy smoker                              |
| <b>Palattella</b>       | 2008 | RCT (unicenter)   | Italy / University                            | 16 (6/10)     | 21-49 (35)                         | Immediate                 | Mx     | SLA (Straumann, Basel, Switzerland)                                                 | Only light smokers, but exact number not informed |
| <b>Pellicer-Chover</b>  | 2014 | RCT (unicenter)   | Spain / University                            | 15 (9/6)      | NM (63.7)                          | Delayed (10-12 wk)        | Mx, Md | Kohno SP (Sweden & Martina, Due Carrare, Italy)                                     | No                                                |
| <b>Peñarrocha-Diogo</b> | 2008 | RA (unicenter)    | Spain / University                            | 100 (45/55)   | 20-76 (47.5)                       | Delayed (6-8 wk)          | Mx, Md | Defcon Avantblast, Impladent (Sentmenat, Barcelona, Spain)                          | 10 light smokers<br>31 heavy smokers              |
| <b>Peñarrocha-Diogo</b> | 2011 | RA (unicenter)    | Spain / University                            | 30 (13/17)    | 36-68 (53.2)                       | Delayed (6-10 wk)         | Mx, Md | Defcon Avantblast TSA, Impladent (Senmenat, Barcelona, Spain)                       | Light smokers, but exact number not informed      |
| <b>Peñarrocha-Diogo</b> | 2012 | RA (unicenter)    | Spain / University                            | 150 (73/77)   | 25-80 (55.4)                       | Delayed (2-3 mo)          | Mx, Md | Defcon implants (Impladent SL, Barcelona, Spain)                                    | NM                                                |
| <b>Peñarrocha-Oltra</b> | 2012 | RA (unicenter)    | Spain / University                            | 70 (32/38)    | 34-75 (54)                         | Delayed (8-10 wk)         | Mx     | NM                                                                                  | 27 light smokers                                  |
| <b>Peñarrocha-Oltra</b> | 2013 | CCT (unicenter)   | Spain / University                            | 29 (13/16)    | 28-77 (55.4)                       | Immediate, delayed (2 mo) | Mx     | Kohno SP (Sweden & Martina, Due Carrare, Italy)                                     | No                                                |
| <b>Perry</b>            | 2004 | RA (multicenter)  | USA / Private practice                        | 442 (194/248) | 17-92 (55)                         | Delayed (3-5 mo)          | Mx, Md | Frialit-2 (Dentsply Friadent, Mannheim, Germany)                                    | NM                                                |
| <b>Pettersson</b>       | 2015 | RA (unicenter)    | Sweden / Private practice                     | 88 (32/56)    | NM (65)                            | Delayed (3-4 mo)          | Mx, Md | Replace Select TiUnite (Nobel Biocare, Göteborg, Sweden)                            | Yes, but exact number not informed                |
| <b>Piek</b>             | 2013 | CCT (unicenter)   | Israel / University                           | 141 (58/83)   | NM (57.6)                          | Immediate, delayed        | Mx, Md | NM (Paltop Advanced Dental Solutions Ltd., Caesarea, Israel)                        | 16 smokers                                        |
| <b>Pieri</b>            | 2009 | CCT (unicenter)   | Italy / Private practice                      | 23 (10/13)    | 51-72 (61.9)                       | Immediate                 | Mx, Md | NM (Keystone Dental, Burlington, USA)                                               | Light smokers, but exact number not informed      |
| <b>Polizzi</b>          | 2000 | CCT (multicenter) | Many countries / Private practice+ University | 143 (68/75)   | NM (47, females)<br>NM (40, males) | Delayed (3-6 mo)          | Mx, Md | Brånemark (Nobel Biocare AB, Göteborg, Sweden)                                      | NM                                                |
| <b>Polizzi</b>          | 2015 | RA (unicenter)    | Italy / Private practice                      | 27 (7/20)     | 34-71 (55.8)                       | Immediate                 | Mx     | Nobel Speedy Groovy, Nobel Replace Select Tapered (Nobel Biocare, Göteborg, Sweden) | Yes, but exact number not informed                |
| <b>Pozzi</b>            | 2014 | RA (unicenter)    | Italy / Private practice                      | 73 (32/41)    | 19-76 (50.59)                      | Immediate, delayed        | Mx, Md | MK III, MK IV, Nobel Replace Select Tapered (Nobel Biocare, Göteborg, Sweden)       | NM                                                |
| <b>Pozzi</b>            | 2015 | PS (unicenter)    | Italy / University                            | 54 (22/32)    | 23-80 (56.2)                       | Immediate                 | Mx, Md | Nobel Replace Conical Connection (Nobel Biocare, Göteborg, Sweden)                  | 3 light smokers                                   |
| <b>Pozzi</b>            | 2016 | RA (multicenter)  | Italy / Private practice                      | 64 (26/38)    | 21-80 (52.8)                       | Immediate                 | Mx, Md | Nobel Replace Conical Connection (Nobel Biocare, Göteborg, Sweden)                  | Only light smokers, but exact number not informed |

|                   |      |                    |                                                               |               |              |                                      |        |                                                             |                                                             |
|-------------------|------|--------------------|---------------------------------------------------------------|---------------|--------------|--------------------------------------|--------|-------------------------------------------------------------|-------------------------------------------------------------|
| <b>Prati</b>      | 2020 | PS (multi-center)  | Italy / University + Private practice                         | 76 (34/42)    | NM (55.6)    | Delayed (3 mo)                       | Mx, Md | Premium SP (Sweden & Martina, Due Carrare, Italy)           | 8 heavy smokers                                             |
| <b>Prati</b>      | 2020 | PS (multi-center)  | Italy / University + Private practice                         | 56 (27/29)    | NM (55)      | Delayed (3 mo)                       | Mx, Md | Prama (Sweden & Martina, Due Carrare, Italy)                | Only light smokers, but exact number not informed           |
| <b>Raes</b>       | 2012 | CCT (unicenter)    | Belgium / University                                          | 96 (41/55)    | 18-72 (43)   | Immediate                            | Mx     | Osseospeed (AstraTech AB, Mölndal, Sweden)                  | No                                                          |
| <b>Raes</b>       | 2013 | CCT (unicenter)    | Belgium / University                                          | 48 (27/21)    | NM           | Immediate                            | Mx     | Osseospeed (AstraTech AB, Mölndal, Sweden)                  | 4 former smokers                                            |
| <b>Raes</b>       | 2017 | CCT (multi-center) | Belgium, USA, Spain / University                              | 96 (41/55)    | 18-72 (43)   | Immediate                            | Mx     | OsseoSpeed (Astra Tech, Dentsply Implants, Mölndal, Sweden) | No                                                          |
| <b>Raes</b>       | 2018 | PS (multi-center)  | Italy, Belgium / Private practice + University                | 46 (23/23)    | 18-73 (44.5) | Immediate                            | Mx, Md | AnyRidge (MegaGen Implant, Gyeongbuk, South Korea)          | 17 smokers                                                  |
| <b>Ribeiro</b>    | 2008 | RA (multicenter)   | Brazil / University                                           | 64 (27/37)    | 23-71 (45.4) | Immediate                            | Mx     | NM (Conexão, São Paulo, Brazil)                             | NM                                                          |
| <b>Rodrigo</b>    | 2012 | CCT (unicenter)    | Spain / Private practice                                      | 22 (8/14)     | 33-76 (59.3) | Immediate, delayed (2-4 mo)          | Mx, Md | SLA (Straumann, Basel, Switzerland)                         | 3 light smokers<br>3 heavy smokers<br>2 extra-heavy smokers |
| <b>Romanos</b>    | 2012 | RA (unicenter)     | Germany / Private practice                                    | 55 (20/35)    | NM (63)      | Immediate                            | Md     | Ankylos (Friadent, Mannheim, Germany)                       | NM                                                          |
| <b>Romanos</b>    | 2014 | RA (NM)            | NM                                                            | 27 (15/12)    | NM (59)      | Immediate                            | Mx, Md | Ankylos (Dentsply Implants, Mölndal, Sweden)                | 2 light smokers<br>6 extra-heavy smokers                    |
| <b>Romanos</b>    | 2014 | RA (NM)            | NM                                                            | 26 (6/20)     | NM (57)      | Immediate                            | Mx     | Ankylos (Dentsply Implants, Mölndal, Sweden)                | NM                                                          |
| <b>Saridakis</b>  | 2018 | RA (unicenter)     | Germany / University                                          | 98 (NM)       | > 18         | Immediate, delayed                   | Mx, Md | Nobel Active (Nobel Biocare, Göteborg, Sweden)              | No                                                          |
| <b>Sato</b>       | 2014 | PS (multi-center)  | Japan / University + Private practice                         | 63 (25/38)    | NM (54)      | Immediate                            | Mx, Md | Nobel Direct (Nobel Biocare, Göteborg, Sweden)              | 14 smokers                                                  |
| <b>Schiegnitz</b> | 2016 | RA (unicenter)     | Germany / University                                          | 90 (38/52)    | 22-87 (57.7) | NM                                   | Mx, Md | Straumann TE (Straumann, Basel, Switzerland)                | NM                                                          |
| <b>Schlee</b>     | 2014 | PS (multi-center)  | Netherlands, Germany, Italy, France, Spain / Private practice | 105 (50/55)   | 22-77 (55.2) | NM                                   | Mx, Md | Trabecular Meta Material ( Zimmer TMT, Parsippany, USA)     | 17 light and heavy smokers                                  |
| <b>Schoenbaum</b> | 2021 | RA (multi-center)  | USA / Private practice                                        | 378 (181/197) | NM (60)      | NM                                   | Mx, Md | NM                                                          | 15% of the implants in smokers and former smokers           |
| <b>Sennerby</b>   | 2008 | RA (multicenter)   | Sweden, Italy, USA / University + Private practice            | 43 (20/23)    | NM (50)      | Immediate/early, delayed (6 wk-6 mo) | Mx, Md | TiUnite, NobelDirect (Nobel Biocare, Göteborg, Sweden)      | NM                                                          |
| <b>Siciliano</b>  | 2009 | CCT (unicenter)    | Italy / University                                            | 30 (16/14)    | NM (49)      | Delayed (3 mo)                       | Mx, Md | Straumann TE (Straumann, Basel, Switzerland)                | No                                                          |

|                     |      |                   |                                                                   |               |                      |                            |        |                                                                                                                                                                             |                                                        |
|---------------------|------|-------------------|-------------------------------------------------------------------|---------------|----------------------|----------------------------|--------|-----------------------------------------------------------------------------------------------------------------------------------------------------------------------------|--------------------------------------------------------|
| <b>Siebers</b>      | 2010 | CCT (unicenter)   | Germany / Private practice                                        | 76 (34/42)    | 22-85 (52)           | Delayed (4-6 mo)           | Mx, Md | Camlog Rootline and Screw Line (Camlog Biotechnologies, Basel, Switzerland), Osseotite (Biomet 3i, Palm Beach Gardens, USA), Restore RBM (Lifecore Biomedical, Chaska, USA) | 15 smokers                                             |
| <b>Swart</b>        | 2014 | PS (unicenter)    | South Africa / Private practice                                   | 8 (NM)        | 38-72 (60)           | Immediate                  | Md     | NM                                                                                                                                                                          | Light and heavy smokers, but exact number not informed |
| <b>Tallarico</b>    | 2016 | RA (NM)           | NM                                                                | 56 (25/31)    | NM (66.2)            | Immediate, delayed         | Mx, Md | NobelReplace Conical Connection, NobelSpeedy Groovy, Brånemark MKIII, NobelReplace Tapered Groovy (Nobel Biocare, Göteborg, Sweden)                                         | 3 light smokers                                        |
| <b>Tallarico</b>    | 2017 | RCT (unicenter)   | Italy / Private practice                                          | 24 (8/16)     | 37-67 (53)           | Delayed (4 mo)             | Mx, Md | Ultra-Wide (Osstem, Seoul, South Korea)                                                                                                                                     | No                                                     |
| <b>Testori</b>      | 2014 | RA (unicenter)    | Italy / University                                                | 80 (38/42)    | NM (59)              | Immediate, delayed         | Mx, Md | NM (Biomet 3i, Garden Beach, USA)                                                                                                                                           | 11 light smokers<br>15 heavy smokers                   |
| <b>Thome</b>        | 2020 | RA (unicenter)    | Brazil / Private practice                                         | 101 (48/53)   | NM (59.2)            | Immediate, delayed         | Mx, Md | Helix Acqua GM (Neodent, Curitiba, Brazil)                                                                                                                                  | NM                                                     |
| <b>Thome</b>        | 2021 | RA (unicenter)    | Brazil / University                                               | 67 (NM)       | NM (60.6)            | Immediate                  | Mx, Md | Helix Acqua GM (Neodent, Curitiba, Brazil)                                                                                                                                  | NM                                                     |
| <b>Tonetti</b>      | 2017 | RCT (multicenter) | Italy, China / Private practice + University                      | 124 (40/84)   | NM (50-55; 2 groups) | Delayed (12 wk)            | Mx, Md | SPI Contact (Thommen Medical AG, Waldenburg, Switzerland)                                                                                                                   | 18 smokers                                             |
| <b>Urdaneta</b>     | 2012 | RA (unicenter)    | USA / Private practice                                            | 291 (147/144) | NM                   | NM                         | Mx, Md | Integra-CP (Bicon, Boston, USA)                                                                                                                                             | Yes, but exact number not informed                     |
| <b>van Kesteren</b> | 2010 | RCT (unicenter)   | USA / Private practice                                            | 24 (NM)       | 28-76 (NM)           | Not loaded                 | Mx, Md | SLA (Straumann, Waldenburg, Switzerland)                                                                                                                                    | Yes, but exact number not informed                     |
| <b>Vandeweghe</b>   | 2012 | RA (multicenter)  | Belgium, South Africa, Germany, UK/ University + Private practice | 75 (31/44)    | 25-82 (58)           | Immediate, delayed (3 mo)  | Mx, Md | NM (Max Southern Implants, Irene, South Africa)                                                                                                                             | 6 light smokers<br>4 heavy smokers                     |
| <b>Walton</b>       | 2016 | PS (unicenter)    | Australia / Private practice                                      | 184 (82/102)  | 15-79 (46.2)         | Immediate, delayed (>3 mo) | Mx, Md | MK III, MK IV, Replace Select, NobelActive, Speedy Groovy TiUnite (Nobel Biocare, Göteborg, Sweden)                                                                         | Yes, but exact number not informed                     |
| <b>Watzek</b>       | 1995 | RA (unicenter)    | Austria / University                                              | 20 (6/14)     | NM                   | Delayed (3-6 mo)           | Mx, Md | Brånemark (Nobel Biocare AB, Göteborg, Sweden), TPS (Friedrichsfeld AG, Mannheim, Germany)                                                                                  | NM                                                     |
| <b>Wolfinger</b>    | 2003 | RA (unicenter)    | USA / Private practice                                            | 10 (NM)       | 45-70 (55)           | Immediate, delayed (3 mo)  | Md     | Brånemark (Nobel Biocare AB, Göteborg, Sweden)                                                                                                                              | NM                                                     |
| <b>Zafiropoulos</b> | 2010 | RA (unicenter)    | Germany / Private practice                                        | 252 (127/114) | 43-70 (49)           | Immediate                  | Mx     | Camlog root line (Altatec, Wimsheim, Germany), SLA (Straumann, Waldenburg, Switzerland)                                                                                     | 86 smokers                                             |







[illegible]

|                      |      |   |   |   |   |   |   |   |   |   |     |
|----------------------|------|---|---|---|---|---|---|---|---|---|-----|
| Noelken              | 2014 | 1 | 1 | 0 | 1 | 1 | 1 | 1 | 1 | 1 | 8/9 |
| Norton (1)           | 2004 | 1 | 1 | 1 | 1 | 1 | 1 | 1 | 0 | 1 | 8/9 |
| Norton (2)           | 2017 | 1 | 1 | 1 | 1 | 1 | 1 | 1 | 1 | 1 | 9/9 |
| Oliva                | 2012 | 1 | 1 | 0 | 1 | 1 | 1 | 1 | 0 | 1 | 7/9 |
| Ormianer (1)         | 2008 | 1 | 1 | 0 | 1 | 1 | 1 | 1 | 1 | 1 | 8/9 |
| Ormianer (2)         | 2012 | 1 | 1 | 0 | 1 | 1 | 1 | 1 | 1 | 1 | 8/9 |
| Oxby                 | 2015 | 1 | 1 | 1 | 1 | 1 | 1 | 1 | 1 | 1 | 9/9 |
| Palattella           | 2008 | 1 | 1 | 0 | 1 | 1 | 1 | 1 | 0 | 1 | 7/9 |
| Pellicer-Chover      | 2014 | 1 | 1 | 0 | 1 | 1 | 1 | 1 | 0 |   | 7/9 |
| Peñarrocha-Diago (1) | 2008 | 1 | 1 | 0 | 1 | 1 | 1 | 1 | 1 | 1 | 8/9 |
| Peñarrocha-Diago (2) | 2011 | 1 | 1 | 0 | 1 | 1 | 1 | 1 | 0 | 1 | 7/9 |
| Peñarrocha-Diago (3) | 2012 | 1 | 1 | 0 | 1 | 1 | 1 | 1 | 0 | 1 | 7/9 |
| Peñarrocha-Oltra (1) | 2012 | 1 | 1 | 0 | 1 | 1 | 1 | 1 | 1 | 1 | 8/9 |
| Peñarrocha-Oltra (2) | 2013 | 1 | 1 | 1 | 1 | 1 | 1 | 1 | 1 | 1 | 9/9 |
| Perry                | 2004 | 1 | 1 | 1 | 1 | 1 | 1 | 1 | 0 | 1 | 8/9 |
| Pettersson           | 2015 | 1 | 1 | 1 | 1 | 1 | 1 | 1 | 0 | 1 | 8/9 |
| Piek                 | 2013 | 1 | 1 | 0 | 1 | 1 | 1 | 1 | 1 | 1 | 8/9 |
| Pieri                | 2009 | 1 | 1 | 1 | 1 | 1 | 1 | 1 | 1 | 1 | 9/9 |
| Polizzi (1)          | 2000 | 1 | 0 | 1 | 1 | 1 | 1 | 1 | 0 | 1 | 7/9 |
| Polizzi (2)          | 2015 | 1 | 1 | 1 | 1 | 1 | 1 | 1 | 1 | 1 | 9/9 |
| Pozzi (1)            | 2014 | 1 | 1 | 1 | 1 | 1 | 1 | 1 | 1 | 1 | 9/9 |
| Pozzi (2)            | 2015 | 1 | 1 | 1 | 1 | 1 | 1 | 1 | 1 | 1 | 9/9 |
| Pozzi (3)            | 2016 | 1 | 1 | 1 | 1 | 1 | 1 | 1 | 1 | 1 | 9/9 |
| Prati (1)            | 2020 | 1 | 1 | 1 | 1 | 1 | 1 | 1 | 1 | 1 | 9/9 |
| Prati (2)            | 2020 | 1 | 1 | 1 | 1 | 1 | 1 | 1 | 1 | 1 | 9/9 |
| Raes (1)             | 2012 | 1 | 1 | 0 | 1 | 1 | 1 | 1 | 1 | 1 | 8/9 |
| Raes (2)             | 2013 | 1 | 1 | 1 | 1 | 1 | 1 | 1 | 1 | 1 | 9/9 |
| Raes (3)             | 2017 | 1 | 1 | 0 | 1 | 1 | 1 | 1 | 1 | 1 | 8/9 |
| Raes (4)             | 2018 | 1 | 1 | 0 | 1 | 1 | 1 | 1 | 1 | 1 | 8/9 |
| Ribeiro              | 2008 | 1 | 1 | 1 | 1 | 1 | 1 | 1 | 0 | 1 | 8/9 |
| Rodrigo              | 2012 | 1 | 1 | 1 | 1 | 1 | 1 | 1 | 1 | 1 | 9/9 |
| Romanos (1)          | 2012 | 1 | 1 | 0 | 1 | 1 | 1 | 1 | 0 | 1 | 7/9 |
| Romanos (2)          | 2014 | 1 | 1 | 0 | 1 | 1 | 1 | 1 | 0 | 1 | 7/9 |
| Romanos (3)          | 2014 | 1 | 1 | 0 | 1 | 1 | 1 | 1 | 0 | 1 | 7/9 |
| Saridakis            | 2018 | 1 | 1 | 0 | 1 | 1 | 1 | 1 | 1 | 1 | 8/9 |
| Sato                 | 2014 | 1 | 1 | 0 | 1 | 1 | 1 | 1 | 0 | 1 | 7/9 |
| Schiegnitz           | 2016 | 1 | 1 | 0 | 1 | 1 | 1 | 1 | 1 | 1 | 8/9 |
| Schlee               | 2014 | 1 | 1 | 0 | 1 | 1 | 1 | 1 | 1 | 1 | 8/9 |

|                      |      |   |   |   |   |   |   |   |   |   |     |
|----------------------|------|---|---|---|---|---|---|---|---|---|-----|
| <b>Schoenbaum</b>    | 2021 | 1 | 1 | 0 | 1 | 1 | 1 | 1 | 1 | 1 | 8/9 |
| <b>Sennerby</b>      | 2008 | 1 | 1 | 1 | 1 | 1 | 1 | 1 | 0 | 1 | 8/9 |
| <b>Siciliano</b>     | 2009 | 1 | 1 | 1 | 1 | 1 | 1 | 1 | 1 | 1 | 9/9 |
| <b>Siebers</b>       | 2010 | 1 | 1 | 0 | 1 | 1 | 1 | 1 | 0 | 1 | 7/9 |
| <b>Swart</b>         | 2014 | 1 | 1 | 1 | 1 | 1 | 1 | 1 | 0 | 1 | 8/9 |
| <b>Tallarico (1)</b> | 2016 | 1 | 1 | 1 | 1 | 1 | 1 | 1 | 1 | 1 | 9/9 |
| <b>Tallarico (2)</b> | 2017 | 1 | 1 | 1 | 1 | 1 | 1 | 1 | 1 | 1 | 9/9 |
| <b>Testori</b>       | 2014 | 1 | 1 | 1 | 1 | 1 | 1 | 1 | 1 | 1 | 9/9 |
| <b>Thome (1)</b>     | 2020 | 1 | 1 | 1 | 1 | 1 | 1 | 1 | 1 | 1 | 9/9 |
| <b>Thome (2)</b>     | 2021 | 1 | 1 | 0 | 1 | 1 | 1 | 1 | 1 | 1 | 8/9 |
| <b>Tonetti</b>       | 2017 | 1 | 1 | 1 | 1 | 1 | 1 | 1 | 1 | 1 | 9/9 |
| <b>Urdaneta</b>      | 2012 | 1 | 1 | 0 | 1 | 1 | 1 | 1 | 1 | 1 | 8/9 |
| <b>van Kesteren</b>  | 2010 | 1 | 1 | 0 | 1 | 1 | 1 | 1 | 1 | 1 | 8/9 |
| <b>Vandeweghe</b>    | 2012 | 1 | 1 | 1 | 1 | 1 | 1 | 1 | 0 | 1 | 8/9 |
| <b>Walton</b>        | 2016 | 1 | 1 | 1 | 1 | 1 | 1 | 1 | 1 | 0 | 9/9 |
| <b>Watzek</b>        | 1995 | 1 | 1 | 0 | 1 | 1 | 1 | 1 | 0 | 1 | 7/9 |
| <b>Wolfinger</b>     | 2003 | 1 | 1 | 1 | 1 | 1 | 1 | 1 | 0 | 1 | 8/9 |
| <b>Zafiropoulos</b>  | 2010 | 1 | 1 | 0 | 1 | 1 | 1 | 1 | 1 | 1 | 8/9 |
| <b>Zumstein</b>      | 2016 | 1 | 1 | 1 | 1 | 1 | 1 | 1 | 1 | 1 | 9/9 |

<sup>a</sup> 3 months of follow-up was considered to be of adequate length.
